# Supplementary material
Source: PubMed Central journal article supplement (PMC2673479)
Supplement: NIHMS101867-supplement-supplement_1.pdf [file NIHMS101867-supplement-supplement_1.pdf]

**Table 1 Imaging-dependent lethality of tagged strains**

| Strain     | Visibility (%) |    |    |
|------------|----------------|----|----|
|            | 0h             | 1h | 2h |
| LA120      | 96             | 93 | 89 |
| LA123      | 91             | 89 | 81 |
| LA124      | 93             | 89 | 80 |
| LA126      | 94             | 87 | 88 |
| MJL1026-2A | 100            | 92 | 85 |

After fluorescent microscope exposure, three aliquots (resuspended in 50  $\mu$ l) were removed. For each aliquot, the total number of cells was determined and cell viability was estimated by colony formation on plates (at 30 °C in YPD media).
